# Supplementary material for: Spinel oxide CoFe2O4 grown on Ni foam as an efficient electrocatalyst for oxygen evolution reaction
Source: Royal Society of Chemistry journal article supplement (doi:10.1039/c9ra01802f), 2019-01-01
Supplement: c9ra01802f1.pdf [file c9ra01802f1.pdf]

## Supporting Information

### **Spinel oxide $\text{CoFe}_2\text{O}_4$ grown on Ni foam as efficient electrocatalyst for oxygen evolution reaction**

Shasha Zhu,<sup>a</sup> Jinglei Lei,<sup>\*a</sup> Yonghan Qin,<sup>a</sup> Lina Zhang,<sup>a</sup> and Lijun Lu<sup>b</sup>

<sup>a</sup>*College of Chemistry and Chemical Engineering, Chongqing University, Chongqing 400044, China*

<sup>b</sup>*College of Computer Science and Technol, Chongqing University of Posts and Telecommunications, Chongqing 400065, China*

*\*Corresponding author: leijlei@163.com*

## **S1. Electrochemical Measurements.**

The potential was calibrated with respect to reversible hydrogen electrode (RHE).  $E_{\text{RHE}} = E_{\text{Hg/HgO}} + 0.923 \text{ V}$  in 1 M KOH. All the potentials mentioned in our paper are against RHE unless otherwise specified. The overpotential ( $\eta$ ) was calculated according to the following formula:  $\eta(\text{V}) = E_{\text{RHE}} - 1.23 \text{ V}$ .

## **S2. Estimation of Effective Electrochemical Active Surface Area (ECSA).**

Electrochemical capacitance is determined using cyclic voltammetry (CV) measurements. The potential range is typically a 0.1V window taken from open-circuit potential (OCP) of the system. CV measurements are conducted by sweeping the potential across the non-Faradaic region with different scan rates: from  $2 \text{ mV s}^{-1}$  to  $10 \text{ mV s}^{-1}$ . All measured current in this non-Faradaic potential region is assumed to be ascribed to the double-layer charging, by plotting the current density against the scan rate, a linear trend was observed. The linear slope, equivalent to twice of the double-layer capacitance  $C_{\text{dl}}$ , was used to represent the ECSA. As given by eq (1).

$$\text{ECSA} = C_{\text{dl}} / C_s, \quad (1)$$

$C_s$  is the specific capacitance of catalyst or the capacitance of an atomically smooth planar surface of the material per unit area under identical electrolyte conditions.

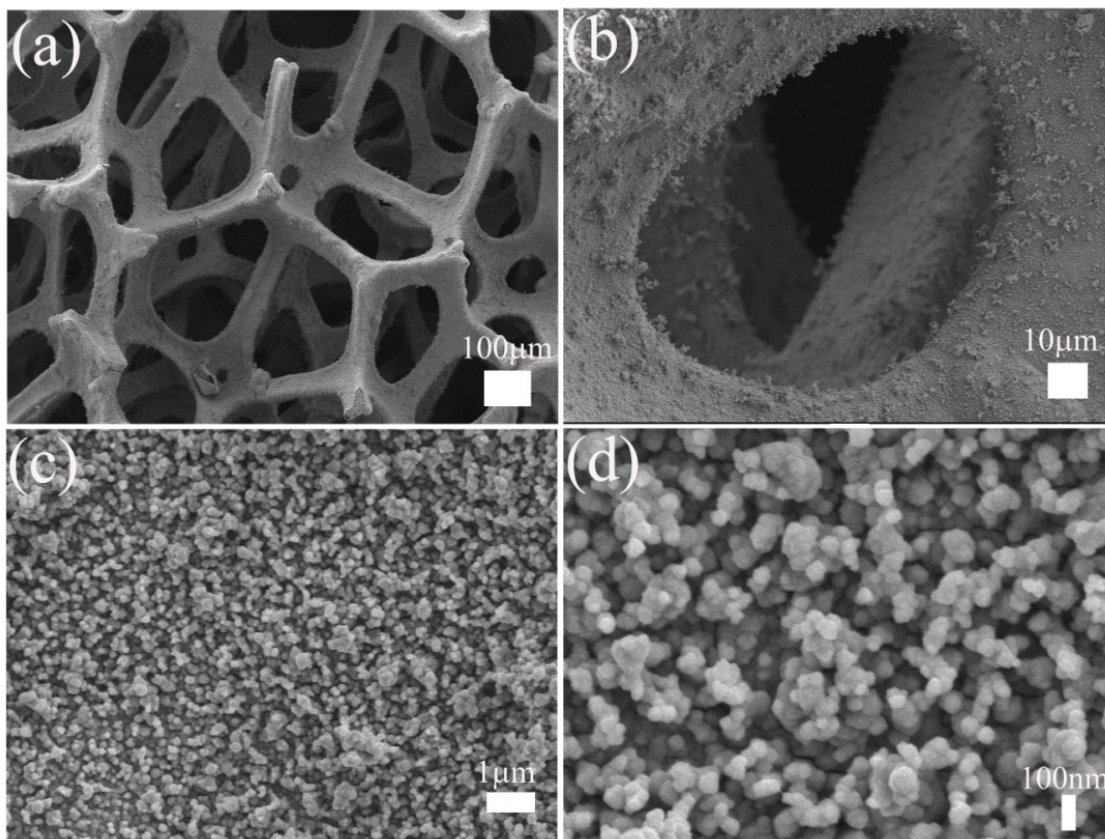

**Fig.S1.** (a - d) FESEM images of  $\text{CoFe}_2\text{O}_4/\text{NF}$  precursors with different magnifications.

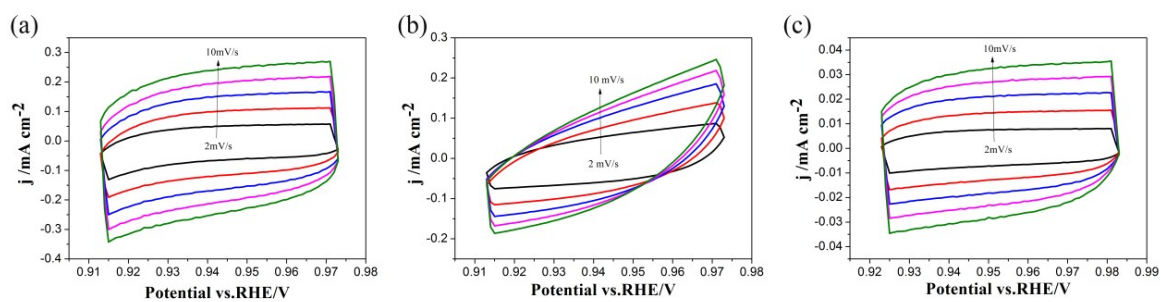

**Fig.S2.** (a-c) Cyclic voltammograms of the (a)  $\text{CoFe}_2\text{O}_4/\text{NF}$ ; (b)  $\text{CoO}_x/\text{NF}$ ; and (c)  $\text{FeO}_x/\text{NF}$  measured at different scan rates from 2 to 10  $\text{mV s}^{-1}$  in 1.0 M KOH.

**Table S1.** OER properties of CoFe<sub>2</sub>O<sub>4</sub>/NF, CoO<sub>x</sub>/NF and FeO<sub>x</sub>/NF.

| Catalyst                             | $\eta/V$                    | $\eta/V$                    | $\eta/V$                     | R <sub>s</sub> | R <sub>ct</sub> |
|--------------------------------------|-----------------------------|-----------------------------|------------------------------|----------------|-----------------|
|                                      | (j=10 mA·cm <sup>-2</sup> ) | (j=50 mA·cm <sup>-2</sup> ) | (j=100 mA·cm <sup>-2</sup> ) |                |                 |
| CoFe <sub>2</sub> O <sub>4</sub> /NF | 273                         | 341                         | 400                          | 0.83           | 2.08            |
| CoO <sub>x</sub> /NF                 | 317                         | 413                         | 478                          | 0.63           | 4.49            |
| FeO <sub>x</sub> /NF                 | 360                         | 449                         | 529                          | 0.73           | 7.24            |

**Table S2.** Comparison of OER electrocatalytic activity of reported CoFe<sub>2</sub>O<sub>4</sub> Catalysts in 1.0 M KOH (overpotentials  $\eta$  calculated by using the formula  $\eta = E_{RHE} - 1.23$  V).

| Catalyst                                                | $\eta/mV$                  | mass loading/mg cm <sup>-2</sup> | Ref.      |
|---------------------------------------------------------|----------------------------|----------------------------------|-----------|
|                                                         | (j=10mA·cm <sup>-2</sup> ) |                                  |           |
| CoFe <sub>2</sub> O <sub>4</sub> /NF                    | 273                        | 0.46                             | This work |
| CoO <sub>x</sub> /NF                                    | 317                        | 0.40                             | This work |
| FeO <sub>x</sub> /NF                                    | 360                        | 0.38                             | This work |
| CoFe <sub>2</sub> O <sub>4</sub>                        | 340                        | 0.32                             | 1         |
| CoFe <sub>2</sub> O <sub>4</sub> /biomass carbon hybrid | 300 (1.0 M NaOH)           | 0.34                             | 2         |
| CoFe <sub>2</sub> O <sub>4</sub> /SWNTs                 | 310                        | 0.50                             | 3         |
| Co <sub>1-y</sub> Fe <sub>y</sub> O <sub>x</sub> /CNTs  | 280                        | 0.52                             | 4         |
| CoFe <sub>2</sub> O <sub>4</sub> Nanoplates             | 410                        | 1.06                             | 5         |
| Co/CoFe <sub>2</sub> O <sub>4</sub> @N-graphene         | 350                        | ~                                | 6         |
| Au-CoFe <sub>2</sub> O <sub>4</sub>                     | 312                        | ~                                | 7         |

## Reference

1. Z. Zhang, J. Zhang, T. Wang, Z. Li, G. Yang, H. Bian, J. Li and D. Gao, *RSC Adv.*, 2018, **8**, 5338-5343.
2. S. Bi, J. Li, Q. Zhong, C. Chen, Q. Zhang and Y. Yao, *RSC Adv.*, 2018, **8**, 22799-22805.
3. Y. Ding, J. Zhao, W. Zhang, J. Zhang, X. Chen, F. Yang, X. Zhang, *ACS Applied Energy Materials*, 2018, **2**, 1026-1032.
4. Y. Fang, X. Li, S. Zhao, J. Wu, F. Li, M. Tian, X. Long, J. Jin and J. Ma, *RSC Adv.*, 2016, **6**, 80613-80620.
5. C. Mahala, M. D. Sharma and M. Basu, *Electrochim. Acta*, 2018, **273**, 462-473.
6. Y. Niu, X. Huang, L. Zhao, W. Hu and C. M. Li, *ACS Sustainable Chem. Eng.*, 2018, **6**, 3556-3564.
7. G. Zhu, X. Li, Y. Liu, W. Zhu and X. Shen, *Appl. Surf. Sci.*, 2019, **478**, 206-212.
